# Supplementary material for: NiO hierarchical structure: template-engaged synthesis and adsorption property
Source: Royal Society of Chemistry journal article supplement (doi:10.1039/c2ra21829a), 2012-01-01
Supplement: c2ra21829a.pdf [file c2ra21829a.pdf]

**Supplementary Information for**

**NiO hierarchical structure: template-engaged synthesis and  
adsorption property**

*Peng Tian, Junwei Ye, Guiling Ning\*, Weitao Gong, Nuo Xu, Qiushuang Zhang, and Yuan Lin*

*State Key Laboratory of Fine Chemicals, School of Chemical Engineering Dalian University of  
Technology, Dalian 116023, China*

*E-mail: [ninggl@dlut.edu.cn](mailto:ninggl@dlut.edu.cn)*

**CAPTIONS:**

**Fig. S1** EDX pattern of the NiO product.

**Fig. S2** TEM images of the porous hierarchical NiO.

**Fig. S3** XRD patterns of samples obtained under time-dependent experiments

**Fig. S4** FE-SEM images of porous hierarchical NiO and the twice-born sample.

**Fig. S5** UV-vis spectra of acid fuchsine solution in the present of NiO sample and the twice-born sample

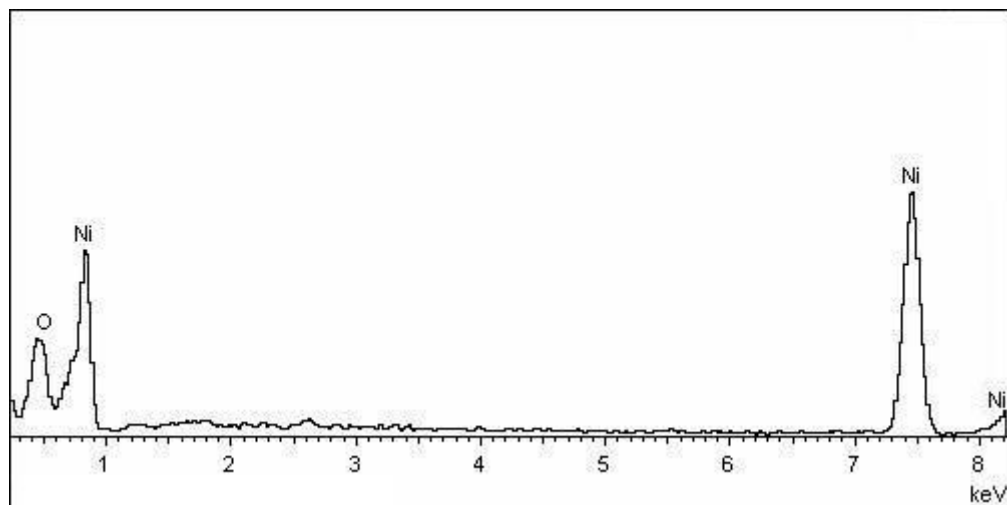

**Fig. S1** EDX pattern of the NiO product.

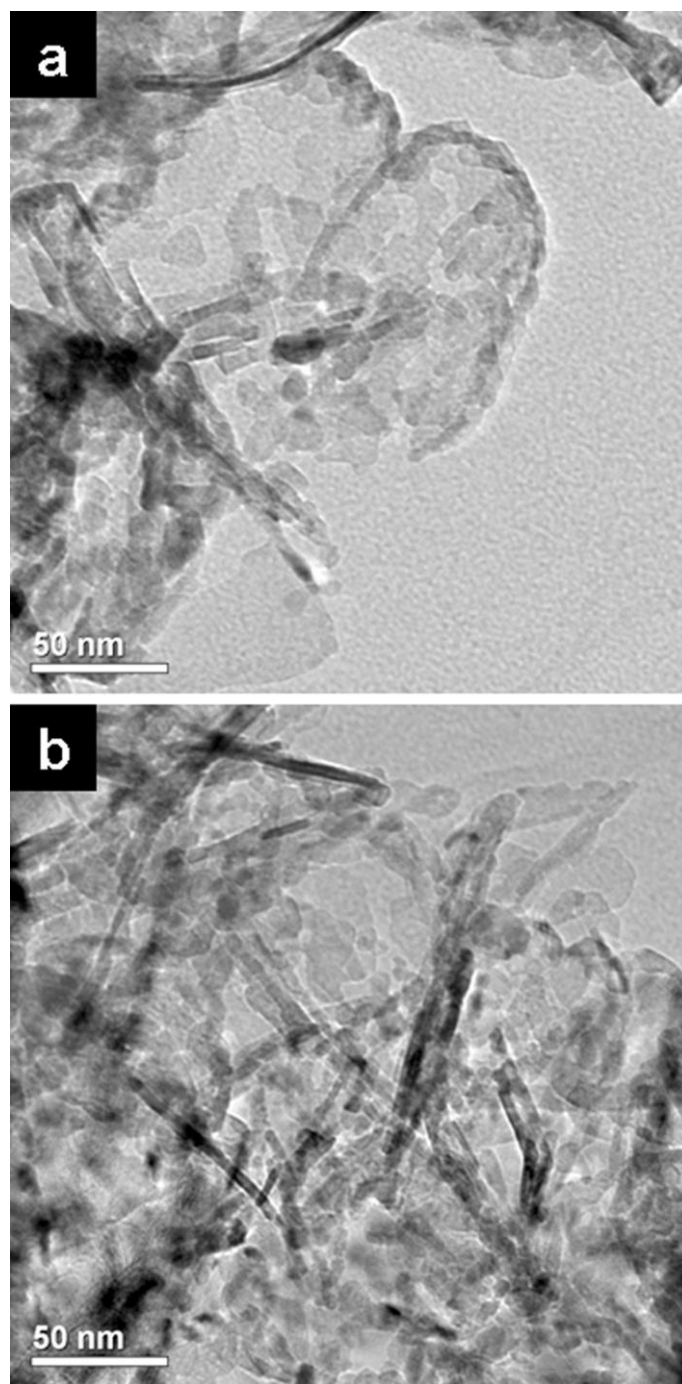

**Fig.S2** TEM images of the porous hierarchical NiO.

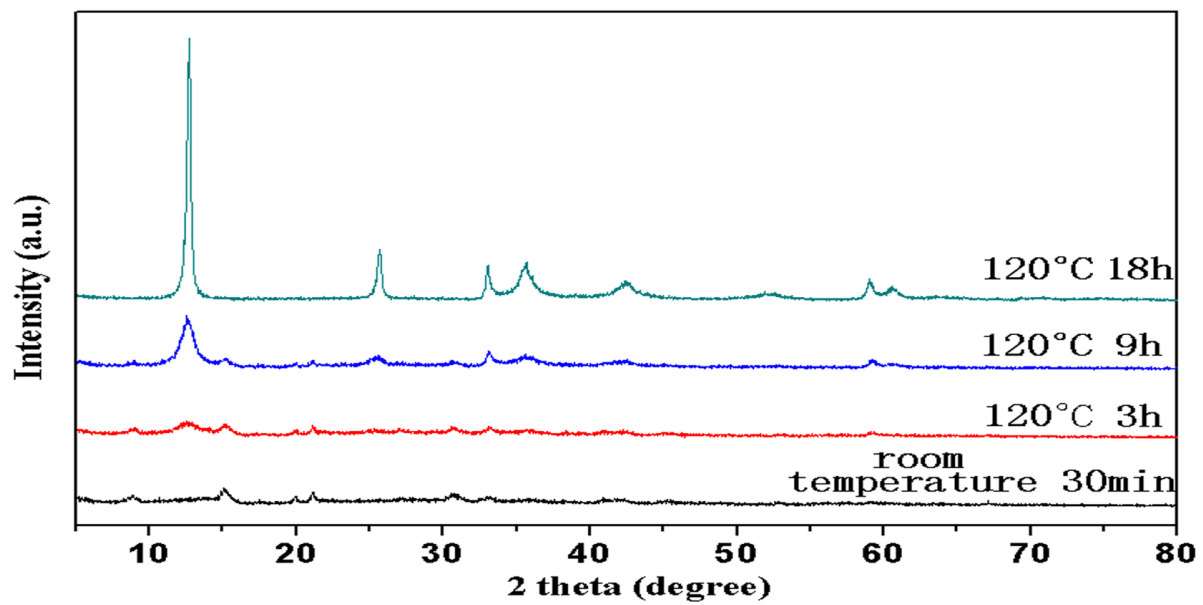

**Fig. S3** XRD patterns of samples obtained under time-dependent experiments

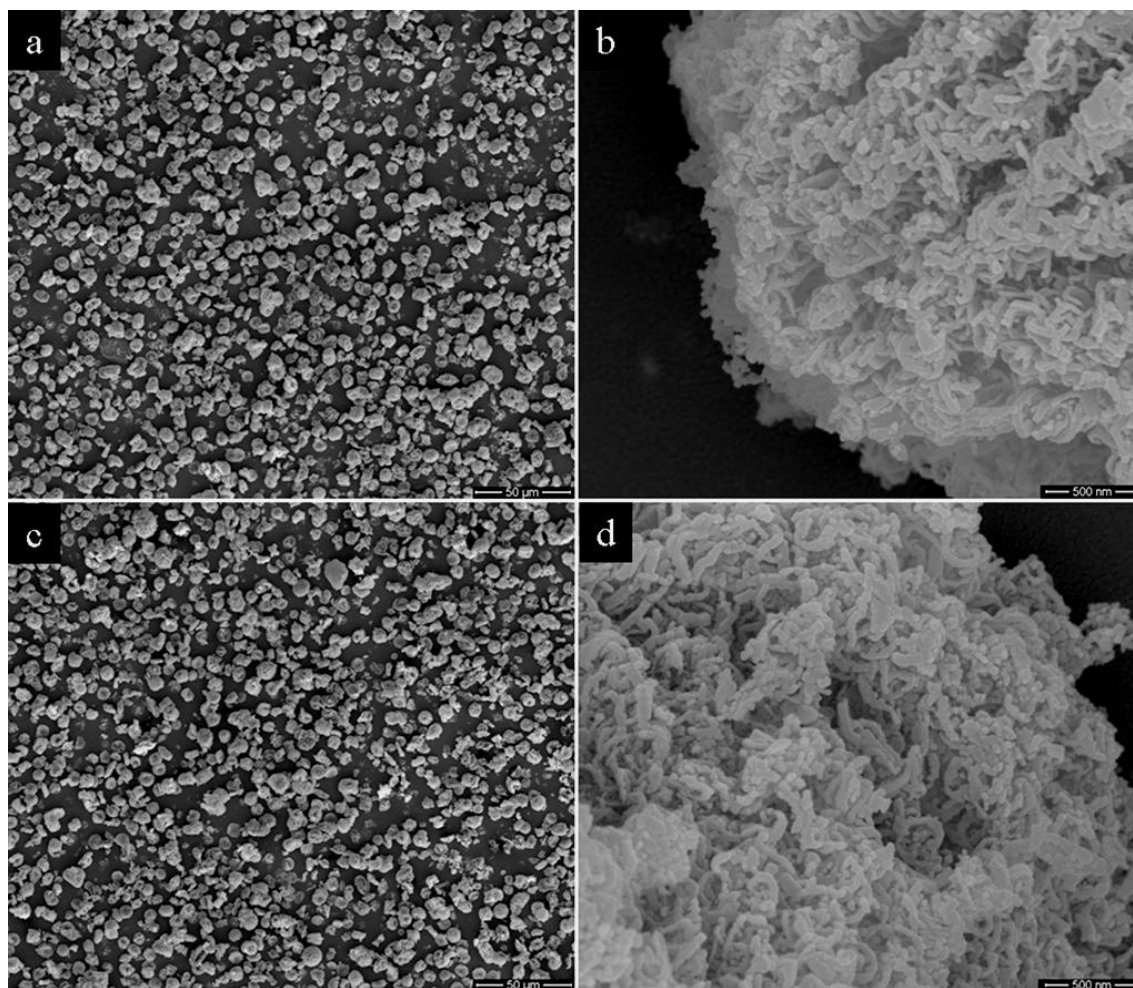

**Fig. S4** Overview FE-SEM images of porous hierarchical NiO (a) and the twice-born one(c); Magnified FE-SEM images of porous hierarchical NiO (b) and the twice-born sample(d).

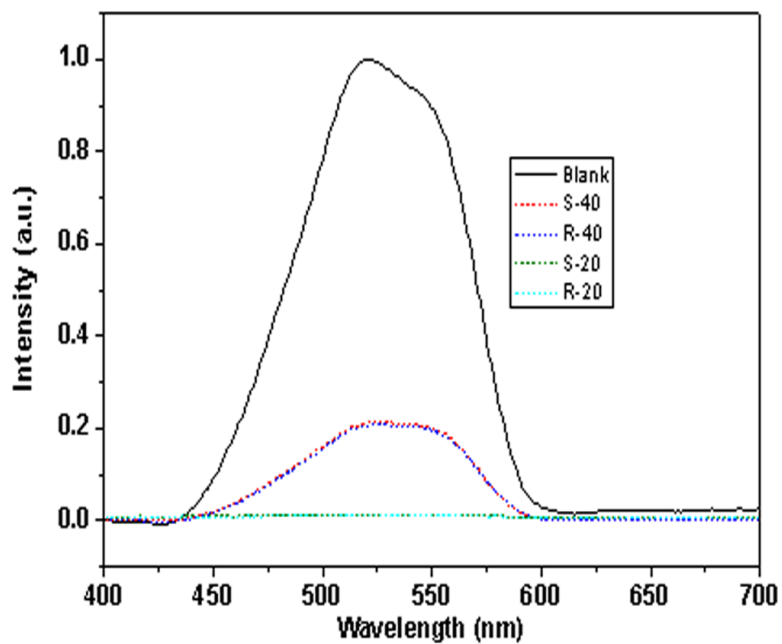

**Fig. S5** UV-vis spectra of acid fuchsine solution in the presence of NiO sample and the twice-born sample after 30 min at the initial acid fuchsine concentrations of 20 and 40 mg/L, respectively.
